# Supplementary material for: Biochemical indicators of euthyroid sick syndrome in critically ill children
Source: publisher site journal article supplement (doi:10.1515/jpem-2022-0232), 2022-09-15
Supplement: Supplementary file 1 [file j_jpem-2022-0232_suppl.docx]

**Supplementary** **Table 1. Comparison of patients’ characteristics between children admitted to PICU who were included to study and children who were not included to study**

| Characteristics | Included to study  (N=386) | Not included to study  (N=537) | P |
| --- | --- | --- | --- |
| Age (month) | 22.5 (90) | 27 (87) | 0.116 |
| Female, n (%) | 164 (43) | 257 (47.8) | 0.106 |
| Weight (kg) | 10 (22.5) | 12.5 (17) | 0.160 |
| PIM3 % | 4.66 (8.1) | 2.96 (5.3) | 0.640 |
| Need for IMV during PICU stay, n (%) | 323 (83.7) | 433 (80.7) | 0.022 |
| Need for Inotrope during PICU stay, n (%) | 168 (43.5) | 161 (30.0) | **<0.001** |
| Primary Reason for Admission, n (%) |  |  | 0.474 |
| Respiratory and Cardiovascular | 157 (40.6) | 191 (35.5) |  |
| Post-operative | 119 (30.8) | 189 (35.1) |  |
| Trauma | 29 (7.5) | 47 (8.7) |  |
| Neurological | 27 (6.9) | 33 (6.1) |  |
| Other | 54 (13.9) | 77 (14.3) |  |
| Underlying cancer, n (%) | 39 (10.1) | 66 (12.2) | 0.093 |
| Sepsis at admission, n (%) | 34 (8.8) | 30 (5.5) | 0.057 |
